1 Identification of *Trypanosoma brucei gambiense* and *T. b. rhodesiense*  
2 in vectors using multiplexed high-resolution melt analysis.

3 Gala Garrod<sup>1</sup>, Emily R. Adams<sup>2</sup>, Jessica K. Lingley<sup>1</sup>, Isabel Saldanha<sup>1</sup>, Stephen J. Torr<sup>1</sup>, Lucas J.  
4 Cunningham<sup>1</sup>

5 <sup>1</sup>Department of Vector Biology, Liverpool School of Tropical Medicine, Liverpool, L3 5QA

6 <sup>2</sup>Department of Tropical Disease Biology, Liverpool School of Tropical Medicine, Liverpool L3 5QA

7

8

9 Abstract

10 **Background**

11 Human African Trypanosomiasis (HAT) is a potentially fatal parasitic infection caused by the  
12 trypanosome sub-species *Trypanosoma brucei gambiense* and *T. b. rhodesiense* transmitted by  
13 tsetse flies. Currently, global HAT case numbers are reaching less than 1 case per 10,000 people in  
14 many disease foci. As such, there is a need for simple screening tools and strategies to replace active  
15 screening of the human population which can be maintained post-elimination for Gambian HAT and  
16 long-term Rhodesian HAT. Here we describe the development of a novel high-resolution melt assay  
17 for the xenomonitoring of *Trypanosoma brucei gambiense* and *T. b. rhodesiense* in tsetse.

18 **Methods**

19 Primers for *T. b. rhodesiense* and *T. b. gambiense* were designed to target species-specific single  
20 copy genes. An additional primer set was included in the multiplex to determine if samples have  
21 sufficient genomic material for detecting low copy number targets. The assay was evaluated on 96  
22 wild-caught tsetse previously identified to be positive for *T. brucei s. l.* of which two were infected  
23 with *T. b. rhodesiense*.

24 **Results**

25 The assay was found to be highly specific with no cross-reactivity with non-target trypanosome  
26 species and the assay limit of detection was  $10^4$  tryps/mL. HRM successfully identified three *T. b.*  
27 *rhodesiense* positive flies and was in agreement with the reference sub-species-specific PCRs. This  
28 assay provides an alternative to running multiple PCRs when screening for pathogenic sub-species of  
29 *T. brucei s. l.* and produces results in ~2 hours, avoiding gel electrophoresis.

30 **Conclusions**

31 This method could provide a component of a simple and efficient method of screening large  
32 numbers of tsetse flies in known HAT foci or in areas at risk of recrudescence or threatened by the  
33 changing distribution of both forms of HAT.

34

## 35 Introduction

36 Human African Trypanosomiasis (HAT) is a potentially fatal disease caused subspecies of  
37 *Trypanosoma brucei* transmitted by the bite of an infected tsetse fly (*Glossina* spp). HAT consists of  
38 two forms of the disease, each with its own distinct parasite, vectors, disease pathology, treatment  
39 and geographical distribution. Gambian HAT (gHAT), caused by *Trypanosoma brucei gambiense*, is a  
40 largely anthroponotic disease found across central and west Africa and accounts for the large  
41 majority of HAT cases (>97%) (1). GHAT can remain asymptomatic for months to years with  
42 symptoms often presenting once the infection has significantly advanced. Conversely, Rhodesian  
43 HAT (rHAT), caused by *Trypanosoma brucei rhodesiense*, is a zoonosis with occasional human  
44 infection, and represents less than 3% of all HAT cases. The World Health Organisation has targeted  
45 the elimination of HAT as a public health problem by 2020, defined as less than 1 new case per 10,  
46 000 inhabitants in at least 90% of endemic foci and fewer than 2000 cases reported globally. Due to  
47 the zoonotic nature of rHAT, this WHO target is applicable to gHAT only. With gHAT on the brink of  
48 elimination and rHAT control remaining an important priority both in terms of human (2) and animal  
49 health, it is crucial to identify any remaining active cases, foci of transmission and areas of  
50 resurgence. The epidemiology of the two forms of HAT differ greatly therefore the monitoring and  
51 screening strategies for each form differ accordingly. Monitoring gHAT is largely reliant on the  
52 screening of the at-risk human population and treatment of cases (3). Accurate estimates of disease  
53 prevalence require high rates of coverage, which can be difficult to achieve, particularly in areas  
54 affected by conflict and political instability (4) and as the prevalence approaches <1 case per 10,000.  
55 As a result, there has been emphasis on the development of rapid diagnostic tests (RDTs) and field-  
56 friendly screening tools. In comparison to gHAT, there has been little progress or investment into the  
57 development of a screening tool for rHAT with current emphasis on passive case detection and  
58 control of the vector population. A reliance on passive detection results in a delay in the  
59 identification and treatment of infected individuals, both of which are crucial for the control of  
60 disease transmission.

61 With declining numbers of cases, active screening programmes are no longer cost-effective (5) and  
62 there is a need for a monitoring tool which can be maintained sustainably for rHAT and post-  
63 elimination for gHAT.

64 Xenomonitoring, the screening of vectors for the presence of parasites, provides a potential  
65 alternative to host sampling. This method has already been successfully utilised as a surveillance tool  
66 within the Lymphatic Filariasis elimination programme (6–8). Vectors are often routinely collected as  
67 part of vector control programmes and are far simpler and less costly to sample than either human  
68 or animal populations. Additionally, screening vectors for infection is often less time consuming and  
69 with efficient processing, can provide a view of disease transmission in real-time. Microscopy has  
70 been traditionally used for vector screening due to its low cost, high specificity and ease of use in-  
71 field. However, the sensitivity of microscopy is highly variable and morphological identification of *T.*  
72 *brucei gambiense* and *T. b. rhodesiense* trypanosomes is not possible.

73 The development of molecular tools has provided highly sensitive alternatives to traditional  
74 screening methods. PCR is widely used for the detection of *Trypanosoma* DNA, with highly sensitive  
75 assays developed for *T. brucei s. l.* (9) which includes *T. b. gambiense* and *T. b. rhodesiense* along with  
76 the animal trypanosome *T. b. brucei*. Successful amplification of the target indicates the presence of  
77 one of the members of *T. brucei s. l.* but does not identify which sub-species is present. Identification  
78 of *T. b. gambiense* and *T. b. rhodesiense* is reliant on the detection of specific single-copy genes for  
79 each subspecies. For detection of these genes, the presence of sufficient genetic material is crucial.  
80 A negative result may indicate the absence of the target species or simply that insufficient DNA is  
81 present. To differentiate between these two scenarios, primers have been designed to screen for  
82 other single-copy genes (10), namely a single-copy phospholipase-C (GPI-PLC) expressed by all  
83 members of *T. brucei s. l.* (11–14). Samples found to have sufficient DNA can then be screened using  
84 primers specific for *T. brucei s. l.* subspecies

85 High-resolution melt analysis (HRM) is a post-qPCR analysis method which can be used to detect  
86 heterogeneity within nucleotide sequences. A fluorescent dye is added to the PCR reaction which  
87 intercalates into double stranded DNA. Following amplification, the amplicon is heated gradually  
88 causing the strands to separate. Separation of the double strands releases the incorporated dye  
89 causing a drop in fluorescence. The rate of DNA strand disassociation and the temperature at which  
90 it separates ( $T_m$ ) is dependent on the nucleotide sequence. Different sequences will have different  
91 melting temperatures which can be used as a diagnostic identifier. HRM is a closed tube process  
92 resulting in a reduced risk of contamination and produces results in approximately two hours making  
93 circumventing gel electrophoresis, making it a faster, more specific alternative to traditional PCR.  
94 Multiplexing allows for the screening of a number of targets simultaneously, making sample  
95 processing more efficient. Here, we describe the design of a multiplexed HRM assay for the  
96 identification of the two sub-species of HAT: *T. b. rhodesiense* and *T. b. gambiense* and sufficient  
97 DNA for single-copy gene identification.

## 98 Methods

99 Primers were designed to produce an amplicon of 150-350 base pairs with distinct melt  
100 temperatures. *T. b. rhodesiense* primers were derived from the sequence for the *T. brucei*  
101 *rhodesiense* serum-resistance-associated (SRA) protein gene (accession number AF097331.1).  
102 Primers for *T. b. gambiense* were previously designed and published by Radwanska *et al.* (15) and  
103 target the sub-species-specific glycoprotein (TgsGP: accession number AJ277951). A third primer set  
104 was designed to identify the presence of sufficient genetic material. These primers amplify a single-  
105 copy phospholipase-C (GPI-PLC) gene expressed by all members of the Trypanozoon group (11–14).

## 106 HRM assay

107 HRM reactions were run in a total volume of 12.5 $\mu$ l consisting of 2.5 $\mu$ l DNA template, 6.25  $\mu$ l HRM  
108 Master Mix (Thermo-start ABgene, Rochester, New York, USA), 3.25  $\mu$ l sterile DNase/RNase free  
109 water (Sigma, ST. Louis, USA) and 400nM of all forward and reverse primers. Reactions were carried

110 out on a Rotor-Gene 6000 real-time PCR machine (Qiagen RGQ system). The following protocol was  
111 followed: denaturation at 95°C for 5 minutes followed by 40 cycles and denaturation for 10 seconds  
112 at 95°C per cycle, annealing and extension for 30 seconds at 58°C, and final extension for 30 seconds  
113 at 72°C. The melting step ran from 75°C to 95°C with a temperature increase of 0.1°C every 2  
114 seconds.

#### 115 Specificity and analytical sensitivity

116 The specificity of the multiplexed assay was evaluated using DNA from a range of non-target  
117 trypanosome species: *Trypanosoma congolense* Savannah (Gam2), *T. congolense* Forest (ANR3), *T.*  
118 *congolense* Kilifi (WG84), *T. simiae* (TV008), *T. godfreyi* (Ken7), *T. vivax* (Y486), *T. grayi* (ANR4) and *T.*  
119 *brucei brucei* (M249). The analytical sensitivity of the assay was assessed using a ten-fold dilution  
120 series of target species DNA. Sub-species-specific PCRs were run alongside for direct comparison of  
121 sensitivities (10,15).

#### 122 Screening of field samples

123 A subsample of 96 wild-caught tsetse (*Glossina swynnertoni*, *G. pallidipes*), previously shown to be *T.*  
124 *brucei s. l.* positive were screened individually for infection using HRM. The flies were from a  
125 collection of 5986 tsetse originally captured in 2015-2016, using odour-baited Nzi traps (16)  
126 deployed at sites in Grumeti and Ikorongo wildlife reserve, and Serengeti National Park of Tanzania.  
127 Captured flies were stored individually in 100% ethanol at room temperature and returned to LSTM  
128 for analysis. DNA extraction was carried out using Genejet DNA purification kit (Thermo K0721)  
129 according to the manufacturer's instructions. Flies were screened using TBR PCR (9) to identify those  
130 infected with *T. brucei s. l.* parasites. All *T. brucei s. l.* positive flies were screened for the presence of  
131 human pathogenic trypanosomes using the multiplexed HRM. Samples were classified as positive by  
132 the presence of a peak occurring at the predicted T<sub>m</sub> with a height above 10% of the maximum  
133 dF/dT of the highest peak. Confirmatory testing was done by processing all flies using SRA PCR for *T.*  
134 *b. rhodesiense* (10) and TgsGP PCR for *T. b. gambiense* (15). Two of the 96 samples were previously

135 identified as being *T. b. rhodesiense* using SRA PCR. Further details of the collection, DNA extraction  
136 and analyses of the tsetse are reported by Lord *et al* (16).

## 137 Results

138 One pair of primers per target was selected based on amplification, distinct T<sub>m</sub> and peak  
139 fluorescence. Product sizes for each amplicon ranged from 134-319 base pairs (Table 1) with peak  
140 temperatures ranging from 79.2°C to 87.5°C. To allow for automated calling of peaks, bin widths of  
141 1.5°C (0.75°C either side of diagnostic T<sub>m</sub>) were set for each target.

142 *Table 1 Primers included in the HRM multiplex*

| Primer   | Species            | Primer sequence 5'-3' | Primer GC (%) | Product size (bp) | Reference  |
|----------|--------------------|-----------------------|---------------|-------------------|------------|
| TbRh1    | <i>T. b.</i>       | GAAGCGGAAGCAAGAATGAC  | 50            | 134               | This study |
| TbRh2    | <i>rhodesiense</i> | GCGCAAGACTTGTAAGAGC   | 55            |                   |            |
| TgsGP1   | <i>T. b.</i>       | GCTGCTGTGTTCCGAGAGC   | 63            | 308               | (15)       |
| TGsGP2   | <i>gambiense</i>   | GCCATCGTGCTTGCCGCTC   | 68            |                   |            |
| GPI-PLC1 | Trypanozoon        | CAGTGTTGCGCTTAAATCCA  | 45            | 319               | This study |
| GPI-PLC2 |                    | CCCGCCAATACTGACATCTT  | 50            |                   |            |

## 143 Analytical specificity and sensitivity

144 No non-specific amplification was seen when the assay was challenged with a range of non-target  
145 trypanosome species, namely *T. congolense* (Savannah, Kilifi and Forest subgroups), *T. vivax*, *T.*  
146 *simiae*, *T. simiae* Tsavo, *T. godfreyi* and *T. grayi*. The limit of detection was found to be 10<sup>4</sup>  
147 trypanosomes/mL for *T. b. gambiense* and *T. b. rhodesiense* using purified DNA. When the analytical  
148 sensitivity of the HRM was compared to TgsGP and SRA PCR, the HRM was as sensitive at detecting  
149 *T. b. gambiense* and tenfold more sensitive for *T. b. rhodesiense*.



150 Screening of field samples

151 GPI-PLC positive control peaks were produced by 43 samples (45%), indicating sufficient DNA  
152 quantity for species specific gene detection (Table 2). Of these 43 flies, three were identified as  
153 positive for *T. b. rhodesiense* DNA (**Error! Reference source not found.**). No samples were positive  
154 for *T. b. gambiense*. The HRM results were consistent with those produced by SRA and TgsGP PCR.  
155 Flies that were positive for GPI-PLC but negative for *T. b. gambiense* or *T. b. rhodesiense* were  
156 considered to be infected with livestock trypanosome *T. b. brucei*.

157 Table 2 Number of positive flies for *T. b. gambiense*, *T. b. rhodesiense* and GPI-PLC

|                          | Positive samples |         |
|--------------------------|------------------|---------|
| Target                   | HRM (n)          | PCR (n) |
| <i>T. b. gambiense</i>   | 0                | 0       |
| <i>T. b. rhodesiense</i> | 3                | 3       |
| GPI-PLC                  | 43               | 19      |

158 Figure 1 Melt profile of field samples showing three *T. b. rhodesiense* positives

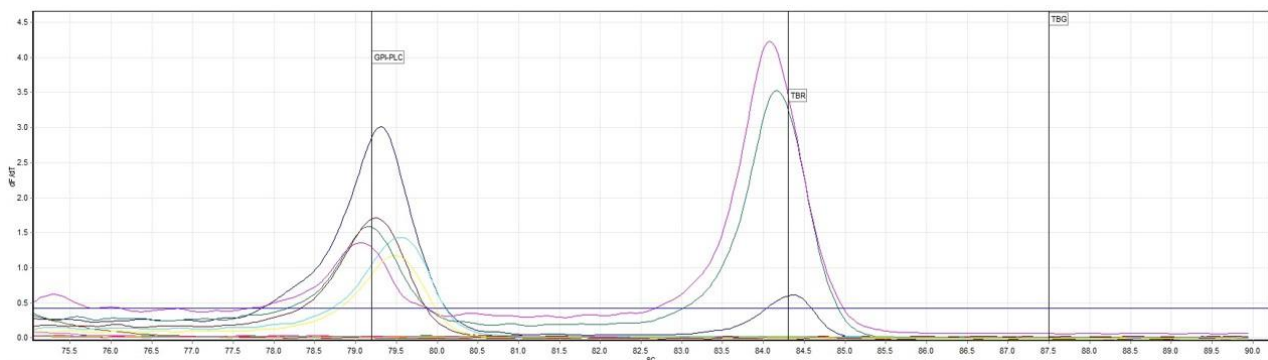

159 Discussion

160 Here we describe a novel high-resolution melt analysis for the detection and differentiation of *T. b.*  
161 *rhodesiense* and *T. b. gambiense*. This multiplexed assay screens for both pathogenic trypanosome  
162 species simultaneously with the addition of a third primer set to identify the presence of sufficient  
163 DNA to detect single-copy genes, acting as a positive control. The assay demonstrated high specificity  
164 with no cross-reaction with other non-target trypanosome species also transmitted by tsetse. The limit

165 of detection of the HRM was lower than those reported in the literature for TgsGP (15) and SRA PCR  
166 (10). However, when the three assays were tested on a dilution series of DNA, HRM was found to be  
167 as sensitive as TgsGP PCR and 10-fold more sensitive than SRA PCR. The assay correctly identified three  
168 wild caught tsetse flies to be positive for *T. b. rhodesiense* DNA. These data were in agreement with  
169 reference sub-species PCRs. Of the 96 flies screened, 45% were found to have adequate genetic  
170 material for single-copy gene detection. As a result, 55% of tsetse remained unidentified to sub-  
171 species level. The method has three advantages over traditional PCR methods. First, the HRM time to  
172 result of  $\leq 2$  hours is faster than PCR followed by gel electrophoresis which can take over  $\geq 3$  hours for  
173 product amplification and visualisation. Second, this is a closed-tube assay which reduces  
174 contamination risk. Finally, it does not require interpretation of gel electrophoresis results. Through  
175 the use of detection bins, sample processing can also be automated, further speeding up and  
176 simplifying data analysis. The simple and fast nature of this method indicates it could be suitable for  
177 the high-throughput processing of tsetse. With prevalence of *T. b. gambiense* in tsetse from HAT foci  
178 predicted to be as low as 1 in  $10^5$  (17), there is a need for a xenomonitoring tool which can be applied  
179 to large numbers of samples. With further optimisation of the assay and DNA extraction protocol, our  
180 method could be applied in the remote and low-resource settings typical of most HAT cases. This  
181 method could therefore provide the basis of a real-time trypanosome transmission monitoring  
182 platform, enabling timely reactive measures by disease control programmes. Furthermore, with the  
183 traditionally distinct geographical distributions of both Rhodesian and Gambian HAT changing due to  
184 the movement of livestock (18), human migration (19) and climate change (20–23), it may become  
185 increasingly important to simultaneously screen for both trypanosome species. The HRM allows for  
186 this and removes the risk of presumptive screening based on historic disease distributions.

187 The authors acknowledge that the reliance of low copy genes for target identification is a limiting  
188 factor of the described diagnostic assay. However, at present these single copy genes are the only  
189 identifiers of members of the *T. brucei* s. l and so poses a challenge to any diagnostic method based  
190 on these targets. This study was also challenged by the unavailability of any field-caught *T. b.*

191 *gambiense* infected tsetse flies. As previously mentioned, trypanosome prevalence in HAT foci is  
192 predicted to be very low (17), therefore making obtaining sufficient field samples for assay validation  
193 an ongoing challenge.

194 In summary, we describe the development of a novel HRM assay for the detection and  
195 discrimination of human African trypanosomes in tsetse flies. The assay also incorporates an internal  
196 control, identifying samples with sufficient genomic material. The closed tube nature of the assay in  
197 addition to the relatively fast time to result lends itself to use in high-throughput xenomonitoring  
198 surveillance campaigns for HAT.

## 199 Acknowledgments

200 We thank Drs Liam Morrison and Jennifer Lord for providing the Tanzanian tsetse samples and  
201 screening data collected under the auspices of the Zoonosis and Emerging and Livestock Systems  
202 (ZELS) programme (BB/L019035/1).

## 203 References

- 204 1. World Health Organization. Trypanosomiasis, human African (sleeping sickness) [Internet].  
205 [cited 2018 Sep 6]. Available from: [http://www.who.int/news-room/fact-](http://www.who.int/news-room/fact-sheets/detail/trypanosomiasis-human-african-(sleeping-sickness))  
206 [sheets/detail/trypanosomiasis-human-african-\(sleeping-sickness\)](http://www.who.int/news-room/fact-sheets/detail/trypanosomiasis-human-african-(sleeping-sickness))
- 207 2. World Health Organization. Accelerating work to overcome the global impact of neglected  
208 tropical diseases: a roadmap for implementation: executive summary. 2012;
- 209 3. World Health Organization. Control and surveillance of human African trypanosomiasis. [cited  
210 2018 Jun 18]; Available from:  
211 [http://apps.who.int/iris/bitstream/handle/10665/95732/9789241209847\\_eng.pdf?sequence](http://apps.who.int/iris/bitstream/handle/10665/95732/9789241209847_eng.pdf?sequence=1&isAllowed=y)  
212 [=1&isAllowed=y](http://apps.who.int/iris/bitstream/handle/10665/95732/9789241209847_eng.pdf?sequence=1&isAllowed=y)
- 213 4. Tong J, Valverde O, Mahoudeau C, Yun O, Chappuis F. Challenges of controlling sleeping

- 214 sickness in areas of violent conflict: experience in the Democratic Republic of Congo. *Confl*  
215 *Health* [Internet]. BioMed Central; 2011 Dec 26 [cited 2019 Sep 12];5(1):7. Available from:  
216 <https://conflictandhealth.biomedcentral.com/articles/10.1186/1752-1505-5-7>
- 217 5. Keating J, Yukich JO, Sutherland CS, Woods G, Tediosi F. Human African trypanosomiasis  
218 prevention, treatment and control costs: A systematic review. Vol. 150, *Acta Tropica*. Elsevier  
219 B.V.; 2015. p. 4–13.
- 220 6. Farid HA, Morsy ZS, Helmy H, Ramzy RMR, El Setouhy M, Weil GJ. A critical appraisal of  
221 molecular xenomonitoring as a tool for assessing progress toward elimination of lymphatic  
222 filariasis. *Am J Trop Med Hyg*. 2007 Oct;77(4):593–600.
- 223 7. Schmaedick MA, Koppel AL, Pilotte N, Torres M, Williams SA, Dobson SL, et al. Molecular  
224 Xenomonitoring Using Mosquitoes to Map Lymphatic Filariasis after Mass Drug  
225 Administration in American Samoa. Bockarie M, editor. *PLoS Negl Trop Dis* [Internet]. 2014  
226 Aug 14 [cited 2020 Jan 15];8(8):e3087. Available from:  
227 <https://dx.plos.org/10.1371/journal.pntd.0003087>
- 228 8. Lau CL, Won KY, Lammie PJ, Graves PM. Lymphatic Filariasis Elimination in American Samoa:  
229 Evaluation of Molecular Xenomonitoring as a Surveillance Tool in the Endgame. Rinaldi G,  
230 editor. *PLoS Negl Trop Dis* [Internet]. 2016 Nov 1 [cited 2020 Jan 15];10(11):e0005108.  
231 Available from: <https://dx.plos.org/10.1371/journal.pntd.0005108>
- 232 9. Moser DR, Ochs DE, Bailey CP, McKane MR, Donelson JE, Cook GA. Detection of trypanosoma  
233 congolense and trypanosoma brucei subspecies by dna amplification using the polymerase  
234 chain reaction. *Parasitology* [Internet]. 1989 Aug 6 [cited 2020 Feb 12];99(1):57–66. Available  
235 from:  
236 [https://www.cambridge.org/core/product/identifier/S0031182000061023/type/journal\\_artic](https://www.cambridge.org/core/product/identifier/S0031182000061023/type/journal_article)  
237 [le](https://www.cambridge.org/core/product/identifier/S0031182000061023/type/journal_article)

- 238 10. Picozzi K, Carrington M, Welburn SC. A multiplex PCR that discriminates between  
239 Trypanosoma brucei brucei and zoonotic T. b. rhodesiense. Exp Parasitol. 2008  
240 Jan;118(1):41–6.
- 241 11. Hereld D, Hart GW, Englund PT. cDNA encoding the glycosyl-phosphatidylinositol-specific  
242 phospholipase C of Trypanosoma brucei (glycolipid anchor/variant surface glycoprotein). Vol.  
243 85, Proc. Natl. Acad. Sci. USA. 1988.
- 244 12. Carrington M, Bülow R, Reinke H, Overath P. Sequence and expression of the glycosyl-  
245 phosphatidylinositol-specific phospholipase C of Trypanosoma brucei. Mol Biochem Parasitol.  
246 Elsevier; 1989 Mar 15;33(3):289–96.
- 247 13. Winkle S. Geißeln der Menschheit. Kulturgeschichte der Seuchen. Kult der Seuchen.  
248 1997;Düsseldorf.
- 249 14. Mensa Wilmot K, Hereld D, Englund PT. Genomic Organization, Chromosomal Localization,  
250 and Developmentally Regulated Expression of the Glycosyl-Phosphatidylinositol-Specific  
251 Phospholipase C of Trypanosoma brucei [Internet]. MOLECULAR AND CELLULAR BIOLOGY.  
252 1990 [cited 2020 Feb 17]. Available from: <http://mcb.asm.org/>
- 253 15. Radwanska M, Claes F, Magez S, Magnus E, Pérez-Morga D, Pays E, et al. Novel primer  
254 sequences for Polymerase Chain Reaction-based detection of [Internet]. 2014 [cited 2018 Sep  
255 10]. Available from: <https://www.researchgate.net/publication/11055435>
- 256 16. JS Lord, RS. Lea, FK. Allan, M Byamungu, DR Hall, J Lingley, F Mramba, E Paxton, GA Vale, JW  
257 Hargrove, LJ Morrison, SJ Torr HA. Assessing the effect of insecticide-treated cattle on tsetse  
258 abundance and trypanosome transmission at the wildlife-livestock interface in Serengeti,  
259 Tanzania. bioRxiv doi. 2020;
- 260 17. Rock KS, Torr SJ, Lumbala C, Keeling MJ. Quantitative evaluation of the strategy to eliminate  
261 human African trypanosomiasis in the Democratic Republic of Congo. Parasites and Vectors.

- 262 BioMed Central Ltd.; 2015 Oct 22;8(1):1–13.
- 263 18. Selby R, Bardosh K, Picozzi K, Waiswa C, Welburn SC. Cattle movements and trypanosomes:  
264 restocking efforts and the spread of *Trypanosoma brucei rhodesiense* sleeping sickness in  
265 post-conflict Uganda. *Parasit Vectors* [Internet]. BioMed Central; 2013 Sep 27 [cited 2019 Sep  
266 12];6(1):281. Available from:  
267 <http://parasitesandvectors.biomedcentral.com/articles/10.1186/1756-3305-6-281>
- 268 19. Picado A, Ndung'u J. Elimination of sleeping sickness in Uganda could be jeopardised by  
269 conflict in South Sudan. Vol. 5, *The Lancet Global Health*. Elsevier Ltd; 2017. p. e28–9.
- 270 20. Lord JS, Hargrove JW, Torr SJ, Vale GA. Climate change and African trypanosomiasis vector  
271 populations in Zimbabwe's Zambezi Valley: A mathematical modelling study. Thomson M,  
272 editor. *PLOS Med* [Internet]. Public Library of Science; 2018 Oct 22 [cited 2020 Feb  
273 18];15(10):e1002675. Available from: <http://dx.plos.org/10.1371/journal.pmed.1002675>
- 274 21. Moore S, Shrestha S, Tomlinson KW, Vuong H. Predicting the effect of climate change on  
275 African trypanosomiasis: integrating epidemiology with parasite and vector biology. [cited  
276 2020 Feb 18]; Available from: <http://rsif.royalsocietypublishing.org>.
- 277 22. Fèvre EM, Coleman PG, Odiit M, Magona JW, Welburn SC, Woolhouse MEJ. The origins of a  
278 new *Trypanosoma brucei rhodesiense* sleeping sickness outbreak in eastern Uganda. *Lancet*  
279 [Internet]. Elsevier Limited; 2001 Aug 25 [cited 2020 Feb 17];358(9282):625–8. Available  
280 from: <https://linkinghub.elsevier.com/retrieve/pii/S0140673601057786>
- 281 23. Picozzi K, Fèvre EM, Odiit M, Carrington M, Eisler MC, Maudlin I, et al. Sleeping sickness in  
282 Uganda: a thin line between two fatal diseases. 2001 [cited 2020 Feb 17]; Available from:  
283 <http://www.bmj.com/>
- 284
